# Supplementary material
Source: Springer Nature journal article supplement (https://www.springermedizin.de/resource/supplementary/12883_2011_689_MOESM3_ESM.pdf/9455812)
Supplement: MOESM3 [file 9455812]

346 papers identified (medline (146),  
embase(118), cinahl (47), dare(17), PEDRO(18),  
cochrane(0))

279 excluded by screening abstract  
and title for inclusion criteria

68 extracted for more detailed  
application of inclusion criteria

12 references added

68 excluded:  
7 reviews  
31 no training UE  
7 no outcome UE  
7 no training  
9 no motor intervention  
3 no clincial trial  
4 population

12 papers selected and analysed
